# Supplementary material for: Construction of MOF-74 analogues through pre-installation of functional ligands: efficient directional functionalization and properties
Source: Royal Society of Chemistry journal article supplement (doi:10.1039/d4ce00008k), 2024-01-01
Supplement: d4ce00008k1.pdf [file d4ce00008k1.pdf]

## Supporting Information

### Construction of MOF-74 Analogues through Pre-Installation of Functional Ligands: Efficient Directional Functionalization and Properties

Nagesh Manurkar,<sup>a</sup> Hao Su,<sup>a</sup> Faiza Arshad,<sup>b</sup> Zhongkui Li<sup>a</sup> and Hui Li<sup>\*a</sup>

<sup>a</sup>School of Chemistry and Chemical Engineering, Beijing Institute of Technology, Beijing 102488, China.

<sup>b</sup>Beijing Key Laboratory of Environmental Science and Engineering, School of Materials Science and Engineering, Beijing Institute of Technology, Beijing 100081, China.

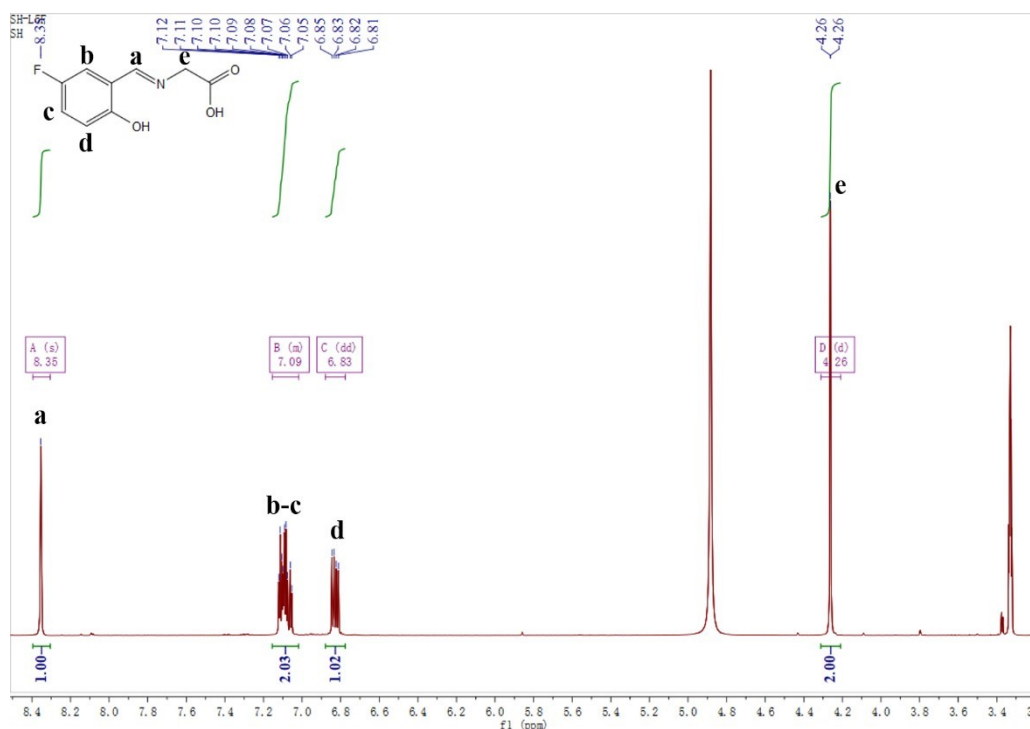

Fig. S1 NMR spectrum of L<sup>1</sup>

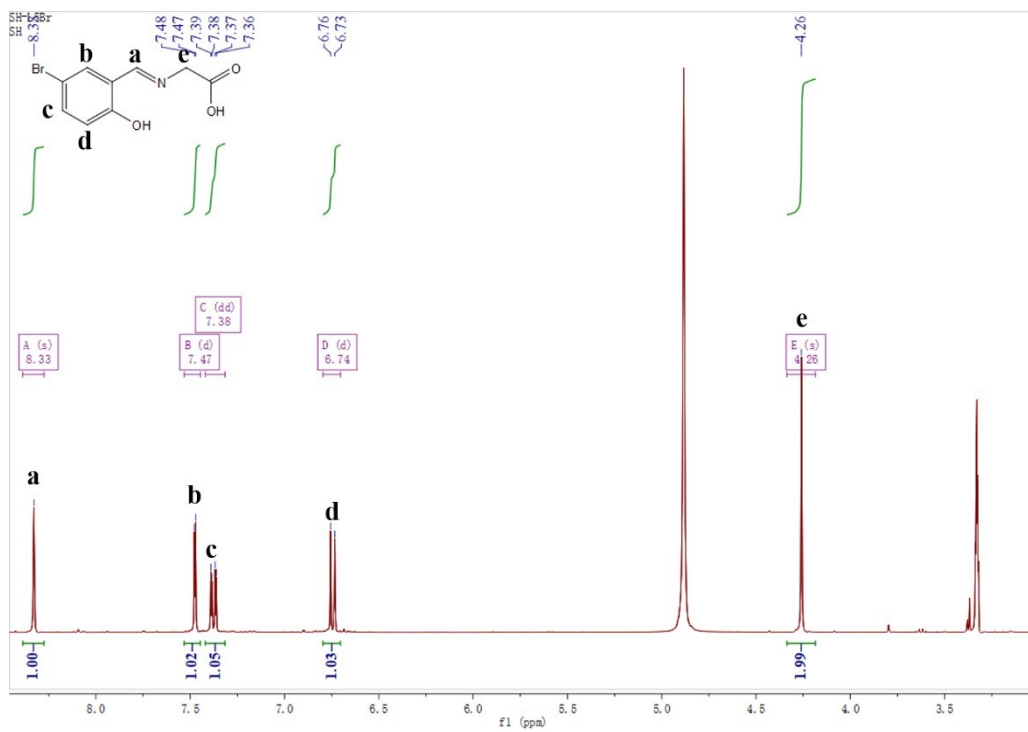

Fig. S2 NMR spectrum of L<sup>3</sup>

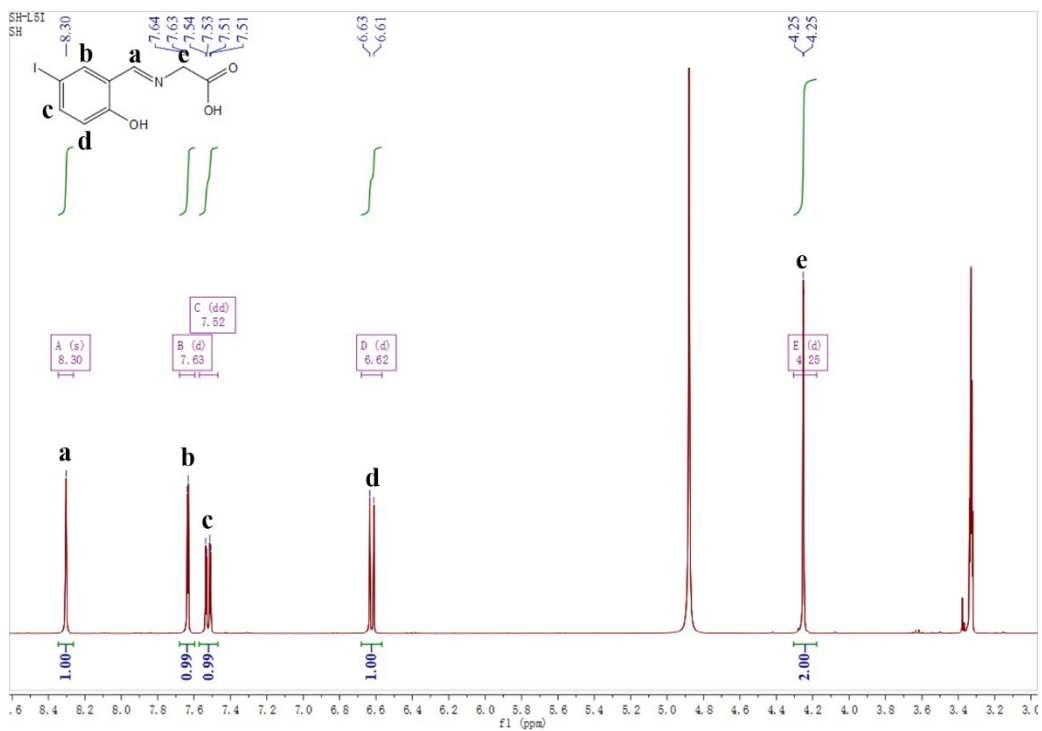

Fig. S3 NMR spectrum of L<sup>4</sup>

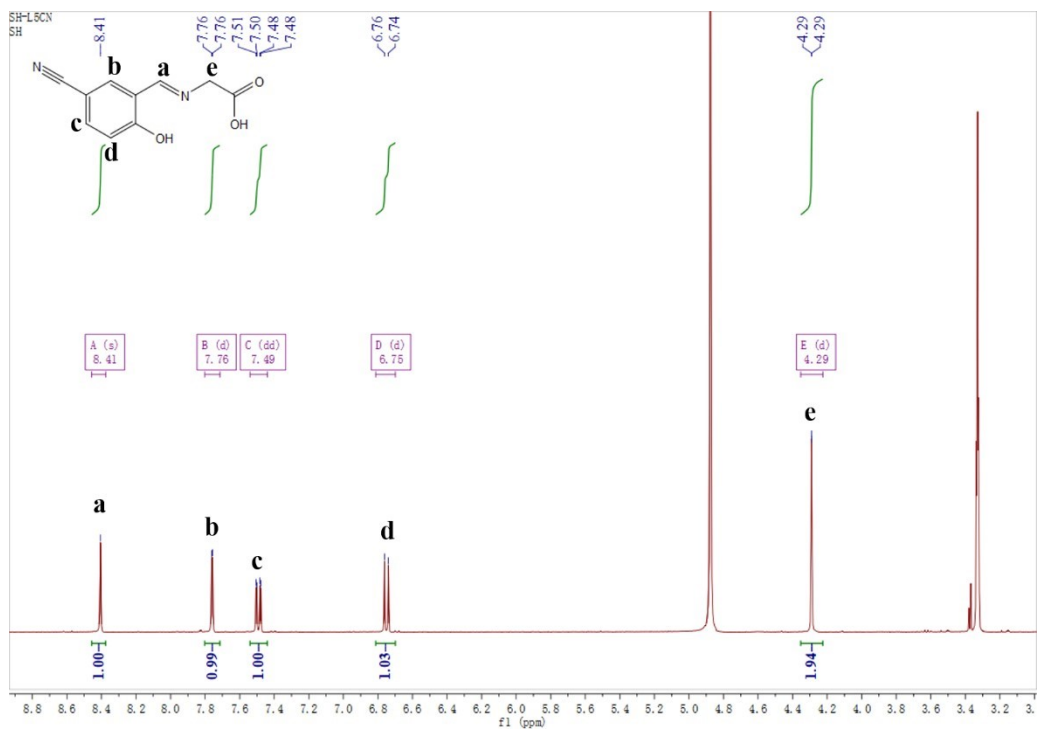

Fig. S4 NMR spectrum of L<sup>5</sup>

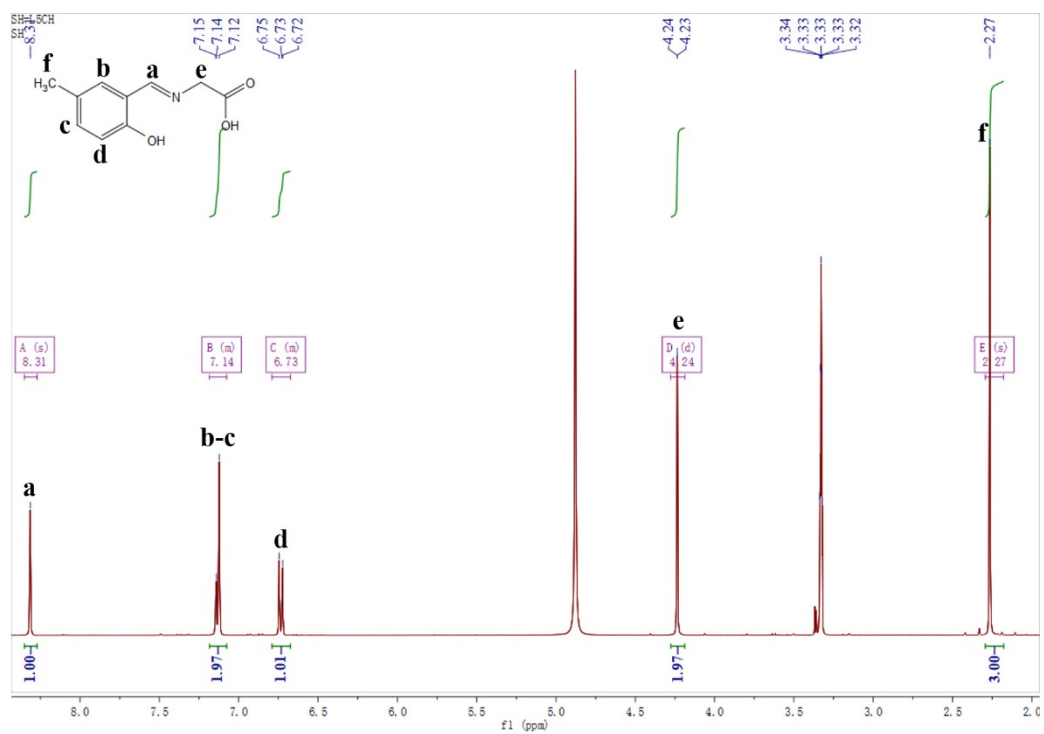

Fig. S5 NMR spectrum of L<sup>6</sup>

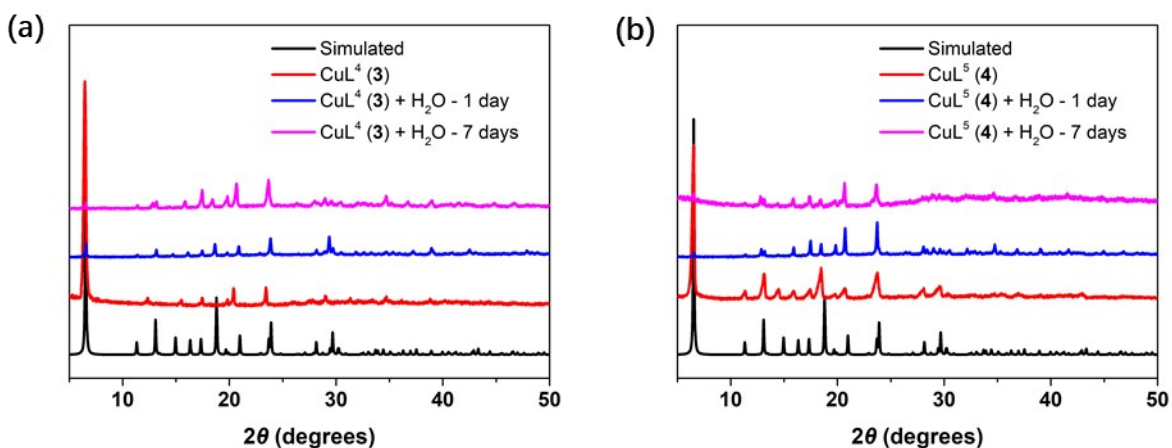

**Fig. S6** The PXRD of as-synthesized samples of complexes  $\text{CuL}^4$  (3) (a),  $\text{CuL}^5$  (4) (b) and that soaked in water for up to 7 days

**Table S1** Selected bond distances (Å) and angles (°) for complex (1)

|                 |            |                 |            |
|-----------------|------------|-----------------|------------|
| Cu(1)–N(1)      | 1.929(3)   | Cu(1)–O(2)      | 1.938(2)   |
| Cu(1)–O(1)      | 1.944(2)   | Cu(1)–O(1)#1    | 1.991(2)   |
| Cu(1)–O(3)#1    | 2.256(2)   | Cu(1)–Cu(1)     | 3.0097(7)  |
| N(1)–Cu(1)–O(2) | 83.99(10)  | N(1)–Cu(1)–O(1) | 93.02(10)  |
| O(2)–Cu(1)–O(1) | 175.22(10) | N(1)–Cu(1)–O(1) | 162.42(10) |
| O(2)–Cu(1)–O(1) | 101.59(9)  | O(1)–Cu(1)–O(1) | 80.21(9)   |
| N(1)–Cu(1)–O(3) | 100.70(11) | O(2)–Cu(1)–O(3) | 93.52(11)  |
| O(1)–Cu(1)–O(3) | 90.70(10)  | O(1)–Cu(1)–O(3) | 95.62(9)   |

**Table S2** Selected bond distances (Å) and angles (°) for complex **(2)**

|                 |            |                 |            |
|-----------------|------------|-----------------|------------|
| Cu(1)–N(1)      | 1.901(4)   | Cu(1)–O(2)      | 1.936(3)   |
| Cu(1)–O(1)      | 1.937(3)   | Cu(1)–O(1)#1    | 2.006(3)   |
| Cu(1)–O(3)#1    | 2.235(3)   | Cu(1)–Cu(1)     | 3.0363(10) |
| N(1)–Cu(1)–O(2) | 83.94(13)  | N(1)–Cu(1)–O(1) | 93.22(13)  |
| O(2)–Cu(1)–O(1) | 174.80(13) | N(1)–Cu(1)–O(1) | 160.17(14) |
| O(2)–Cu(1)–O(1) | 101.98(12) | O(1)–Cu(1)–O(1) | 79.30(13)  |
| N(1)–Cu(1)–O(3) | 106.45(14) | O(2)–Cu(1)–O(3) | 93.16(14)  |
| O(1)–Cu(1)–O(3) | 91.83(13)  | O(1)–Cu(1)–O(3) | 92.23(12)  |

**Table S3** Selected bond distances (Å) and angles (°) for complex **(3)**

|                 |            |                 |            |
|-----------------|------------|-----------------|------------|
| Cu(1)–N(1)      | 1.935(4)   | Cu(1)–O(2)      | 1.941(3)   |
| Cu(1)–O(1)      | 1.926(3)   | Cu(1)–O(1)#1    | 2.013(3)   |
| Cu(1)–O(3)#1    | 2.239(3)   | Cu(1)–Cu(1)     | 3.0578(10) |
| N(1)–Cu(1)–O(2) | 84.08(14)  | N(1)–Cu(1)–O(1) | 93.01(13)  |
| O(2)–Cu(1)–O(1) | 174.27(15) | N(1)–Cu(1)–O(1) | 158.52(14) |
| O(2)–Cu(1)–O(1) | 102.85(13) | O(1)–Cu(1)–O(1) | 78.71(13)  |
| N(1)–Cu(1)–O(3) | 109.77(15) | O(2)–Cu(1)–O(3) | 92.36(16)  |
| O(1)–Cu(1)–O(3) | 90.44(16)  | O(2)–Cu(1)–O(3) | 92.36(16)  |

**Table S4** The bond distances (Å) of complexes (1), (2), and (3)

| Distance (Å) | (1)       | (2)        | (3)        |
|--------------|-----------|------------|------------|
| Cu1-O1       | 1.944(2)  | 1.937(3)   | 1.926(3)   |
| Cu1-O1#1     | 1.991(2)  | 2.006(3)   | 2.013(3)   |
| Cu1-O2       | 1.938(2)  | 1.936(3)   | 1.941(3)   |
| Cu1-N1       | 1.929(3)  | 1.901(4)   | 1.935(4)   |
| Cu1-O3#1     | 2.256(2)  | 2.235(3)   | 2.239(3)   |
| Cu-Cu        | 3.0097(7) | 3.0363(10) | 3.0578(10) |
